# Supplementary material for: Quaternized POSS modified rGO-supported Pd nanoparticles as a highly efficient catalyst for reduction and Suzuki coupling reactions
Source: Royal Society of Chemistry journal article supplement (doi:10.1039/c9nj04491d), 2019-01-01
Supplement: c9nj04491d1.pdf [file c9nj04491d1.pdf]

Supporting Information for *New Journal of Chemistry*

**Electronic Supporting Information**

**Quaternized POSS modified rGO-supported Pd nanoparticles as high efficient catalyst for reduction and Suzuki coupling reactions**

Siwen Xia, Yu Yang, and Changli Lü\*

**Experimental section**

**Synthesis of graphite oxide**

GO was prepared according to the modified Hummer's method. Firstly, 1.0 g of graphite powders, 1.25 g of  $K_2S_2O_8$ , 1.25 g of  $P_2O_5$  and 4.0 mL of  $H_2SO_4$  (98%, 4 mL) were added into a three round-bottom flask, at same time was stirred them at 80 °C for 4.5 h. After the solution was cooled to room temperature, 170 mL of distilled water was added. The black mixture was filtered using a water pump and washed several times with distilled water, then dried under vacuum at 120 °C for 12 h to obtain the pre-oxidized graphite. Secondly, 1 g of pre-oxidized graphite was added to the three round bottom flask, 50 mL of  $H_2SO_4$  (98%) and 5.0 g of  $KMnO_4$  was slowly added under an ice bath to keep the mixture cooled down around 20 °C, the color of the solution was dark green. Then, the solution was stirred for 3.5 h at 35 °C and 30 mL of water was slowly added to the above solution. Next the mixture was further stirred for 15 min at 98 °C and the color of the solution was observed to be turn bright yellow, 240 mL of water and 6 mL of 30 wt%  $H_2O_2$  were separately added to the above mixture. The resulting mixture was obtained by centrifugation and washed several times with 10 wt% HCl solution and distilled water to remove residual acid. Finally, the

graphite oxide was subjected to ultrasonication for 1 h under a water bath. The GO dispersion was collected by centrifugation centrifuged and dried by freeze-drying.

### Synthesis of GO-supported PdNPs (PdNPs@rGO)

GO (30 mg) was dispersed into distilled water (150 mL) using ultrasonication for 30 min. PdCl<sub>2</sub> (6.0 mL, 0.885 mg mL<sup>-1</sup>) was added into the above solution for ultrasound 2.0 h PdCl<sub>2</sub>. 6.0 mL of freshly prepared NaBH<sub>4</sub> solution (0.2 M) was added and the reaction solution was continuously stirred at room temperature for 24 h. The product PdNPs@rGO was collected by centrifugation and washed several times with water and ethanol to remove unsupported palladium nanoparticles and PdCl<sub>2</sub>, then dried at room temperature in a vacuum. The amount of Pd in the PdNPs@rGO catalyst was determined by ICPAES to be about 6.94 wt%

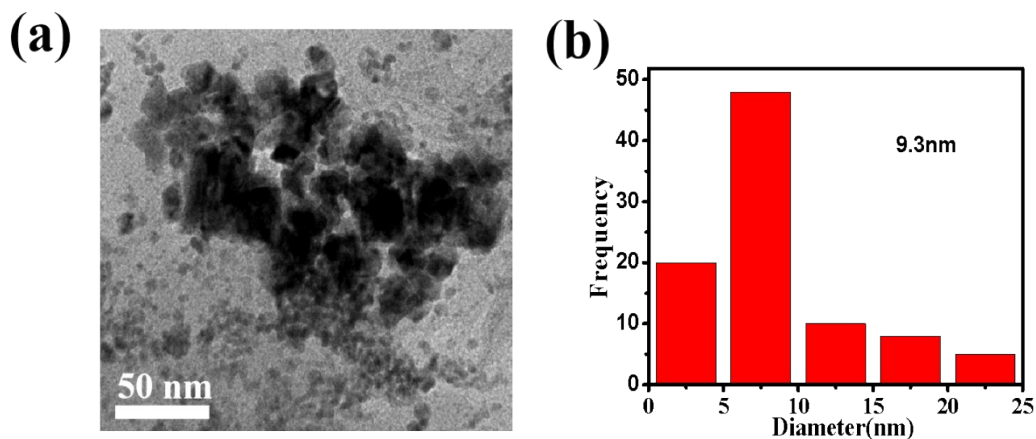

**Fig. S1** TEM image of (a) PdNPs@rGO, and (b) Pd particle size distribution histogram on PdNPs@rGO.

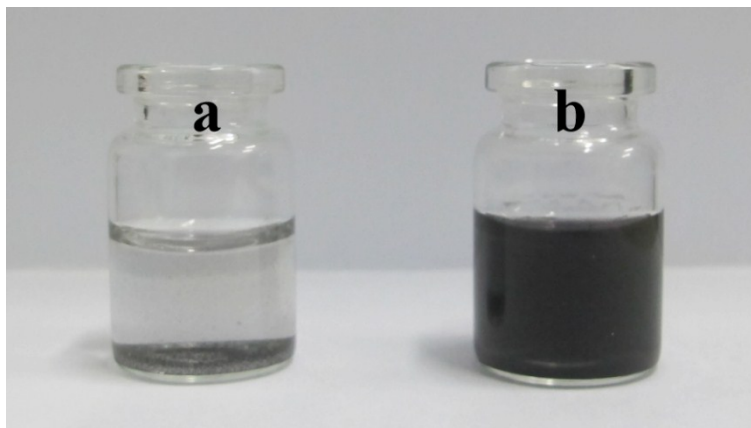

**Fig. S2** Optical photographs of (a) PdNPs@rGO and (b) PdNPs@QPOSS@rGO dispersed in aqueous solution after two weeks, all of their concentrations are  $0.25 \text{ mg mL}^{-1}$ .

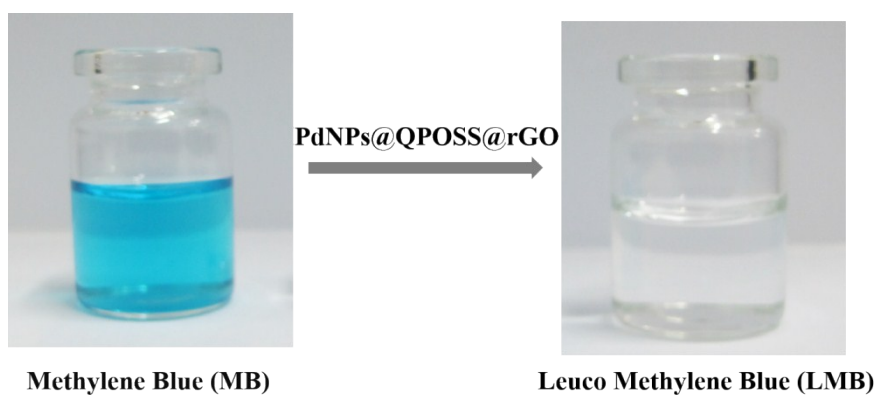

**Fig. S3** Optical photographs for the catalytic reduction of MB to LMB.

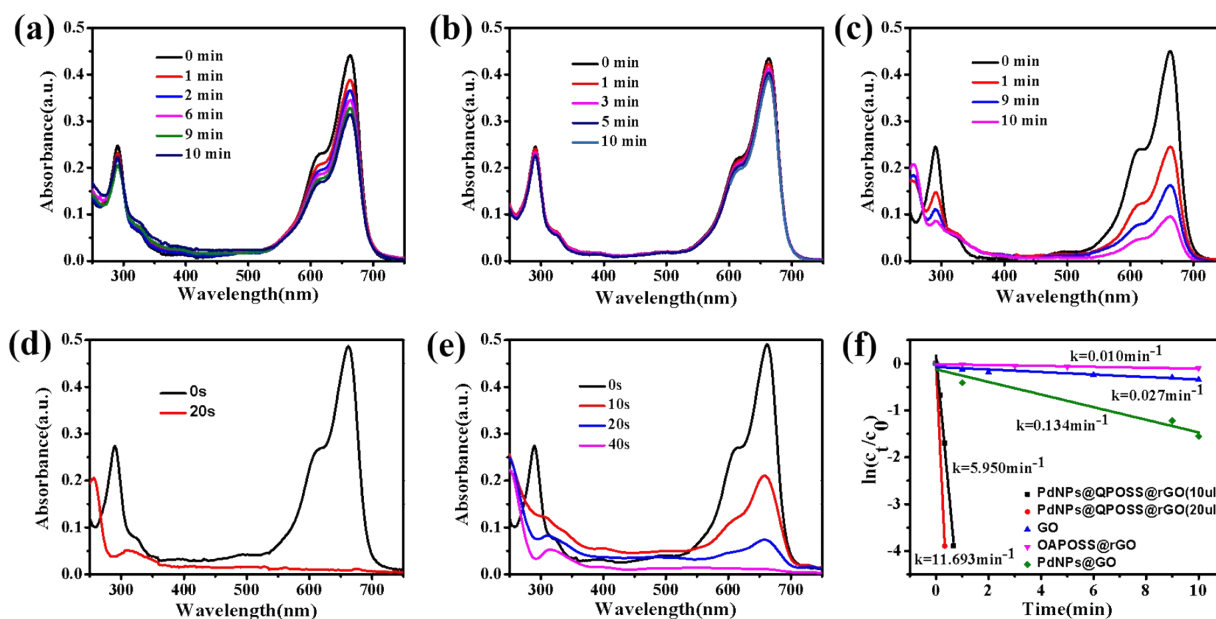

**Fig. S4** Successive reduction reaction of MB using catalysts (20  $\mu\text{L}$ ): (a) GO, (b) OAPOSS@rGO, (c) PdNPs@rGO, (d) PdNPs@QPOSS@rGO (20  $\mu\text{L}$ ), (e) PdNPs@QPOSS@rGO (10  $\mu\text{L}$ ) and (f) Plots of  $\ln(C_t/C_0)$  vs. reaction time ( $t$ ) for different control catalysts (0.1  $\text{mg mL}^{-1}$  catalyst, 2.0 mL of 0.013 mM MB and 1.0 mL of 0.5 M  $\text{NaBH}_4$  were used for the reduction of MB).

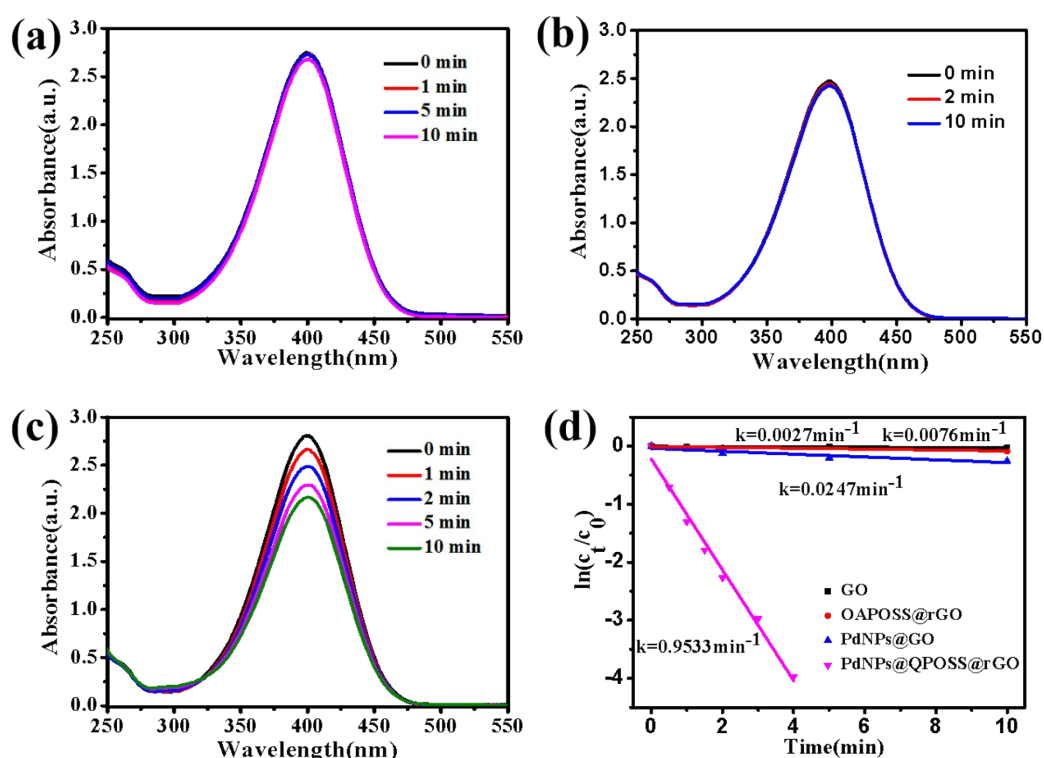

**Fig. S5** Successive reduction of p-NP using (a) GO (30  $\mu\text{L}$ ), (b) OAPOSS@rGO (30  $\mu\text{L}$ ), and (c) PdNPs@rGO (30  $\mu\text{L}$ ) as catalysts (0.25  $\text{mg mL}^{-1}$  catalyst, 2.0 mL of 0.325 mM p-NP and 1.0 mL of 0.2 M  $\text{NaBH}_4$  were used for the reduction of p-NP). and (d) Plots of  $\ln(C_t/C_0)$  vs. reaction time ( $t$ ) for different control catalysts.

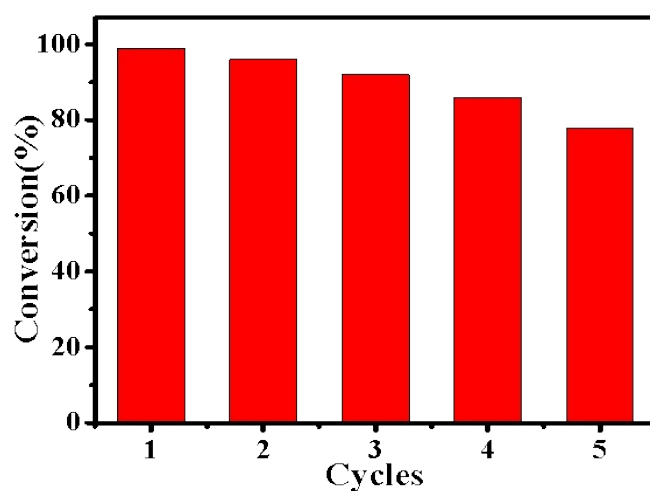

**Fig. S6** The reusability of PdNPs@QPOSS@rGO catalysts in the p-NP reduction reaction.

**Table S1** Comparison of the ability of various catalysts for catalyzing the reduction of MB.

| Samples                                   | Time (s) <sup>a</sup> | <i>k</i> (min) <sup>b</sup> | TOF (min) <sup>c</sup> | Refs      |
|-------------------------------------------|-----------------------|-----------------------------|------------------------|-----------|
| Pd-TNPs/RGO                               | 420                   | 0.4                         | 1.226                  | 1         |
| Ag/MFC                                    | 600                   | 0.34                        | -                      | 2         |
| Graphene-PDA-Pd                           | 300                   | 0.1224                      | -                      | 3         |
| Pd NPs (pc-7)                             | 420                   | 1.006                       | 108.27                 | 4         |
| Pd-PIBrGO                                 | 30                    | 9.563                       | 2198.4                 | 5         |
| Mesoporous3D wood@Pd membrane             | Rapidly               | -                           | 2.02                   | 6         |
| MpSi-Pd                                   | 4                     | 0.655                       | 1.78                   | 7         |
| Fe-Fe <sub>2</sub> O <sub>3</sub> @PDA@Pd | 420                   | 0.9                         | -                      | 8         |
| RGO/Fe <sub>3</sub> O <sub>4</sub>        | 240                   | -                           | -                      | 9         |
| PdNPs@QPOSS@rGO                           | 20                    | 11.693                      | 2431.5                 | This work |

<sup>a</sup> The reduction time of MB in the presence of catalyst. <sup>b</sup> Apparent rate constant. <sup>c</sup> Turnover frequency (TOF), defined as moles of MB molecules reduced per mole of Pd catalyst per unit time, is calculated based on the Pd contents in PdNPs@QPOSS@rGO (3.48 wt%.) determined by ICP.

**Table S2** Comparison of the ability of various catalysts for catalyzing the reduction of p-NP.

| Samples                                                                      | Time(min) | <i>k</i> (min) | TOF(min) <sup>c</sup> | Refs      |
|------------------------------------------------------------------------------|-----------|----------------|-----------------------|-----------|
| Fe <sub>3</sub> O <sub>4</sub> @PDA-Pd@[Cu <sub>3</sub> (btc) <sub>2</sub> ] | 8         | 0.72           | -                     | 10        |
| Pd@TP-POP                                                                    | 5.75      | 0.61           | 3.8                   | 11        |
| GO-MnFe <sub>2</sub> O <sub>4</sub> -PdNPs                                   | 4         | 0.768          | -                     | 12        |
| UiO-66-NH <sub>2</sub> /TTACP/Ni@Pd                                          | 2.5       | 0.852          | -                     | 13        |
| MpSi-Pd                                                                      | 30        | 0.159          | 1.4                   | 7         |
| Au NPs@GFDP                                                                  | 7         | 0.665          | 7.3                   | 14        |
| PS@RGO@Pd                                                                    | 10        | 0.286          | -                     | 15        |
| Pd/CNs                                                                       | 10        | 0.342          | 14.7                  | 16        |
| Graphene-PDA-Pd                                                              | 9         | 0.283          | 0.03                  | 3         |
| PdNPs@QPOSS@rGO                                                              | 4         | 0.95           | 30.6                  | this work |

<sup>a</sup> Turnover frequency (TOF) is defined as the number of moles of p-NP reduced per mole of Pd catalyst per hour.

**Table S3** Comparison of the ability of various catalysts for Suzuki cross-coupling reactions of bromobenzene and phenylboronic acid.

| Entry | Catalyst                                                              | Solvent               | T<br>(°C) | Time<br>(%) | Conversion<br>(%) | Refs      |
|-------|-----------------------------------------------------------------------|-----------------------|-----------|-------------|-------------------|-----------|
| 1     | GO-PdP <sub>2</sub><br>(0.5 mol%)                                     | EtOH-H <sub>2</sub> O | 80        | 2h          | 88                | 17        |
| 2     | PdNPs-IP-IL<br>(1.0 mol%)                                             | H <sub>2</sub> O      | 100       | 6h          | 55                | 18        |
| 3     | Pd@APGO<br>(0.24 mol%)                                                | EtOH-H <sub>2</sub> O | 80        | 6h          | 80                | 19        |
| 4     | Fe <sub>3</sub> O <sub>4</sub> @C-Pd@mCeO <sub>2</sub><br>(0.29 mol%) | EtOH-H <sub>2</sub> O | 80        | 3h          | 95                | 20        |
| 5     | SiO <sub>2</sub> -pA-Cyan-Cys-Pd<br>(0.5 mol%)                        | H <sub>2</sub> O      | 100       | 5.5h        | 88                | 21        |
| 6     | Fe <sub>3</sub> O <sub>4</sub> -DA-DMG/Pd <sup>0</sup><br>(1.0 mol %) | H <sub>2</sub> O      | 80        | 12h         | 97.4              | 22        |
| 7     | 3D IL-rGO/Pd<br>(0.5 mol%)                                            | EtOH-H <sub>2</sub> O | 80        | 1h          | 94                | 23        |
| 8     | 3D G/MWCNTs/Pd<br>(0.5 mol%)                                          | EtOH-H <sub>2</sub> O | 60        | 1h          | 95                | 24        |
| 9     | Pd@GOF<br>(1.1mol%)                                                   | EtOH                  | 40        | 24h         | 97                | 25        |
| 10    | Pd@Mag-Msn<br>(1.0 mol%)                                              | Dioxane               | 80        | 6h          | 77                | 26        |
| 11    | Pd/BOFs<br>(2.6 mol%)                                                 | H <sub>2</sub> O      | 80        | 2h          | 91                | 27        |
| 12    | PEG-Pd<br>(1.2 mol%)                                                  | EtOH-H <sub>2</sub> O | 80        | 12h         | 93                | 28        |
| 13    | PdNPs@QPOSS@rGO<br>(0.3 mol%)                                         | H <sub>2</sub> O      | 80        | 2h          | 99.8              | This work |



**Table S4** Leached amount Pd of PdNPs@QPOSS@rGO by ICP.

| Entry              | Element Pd Concentration in solution, mg/L (ppm) |
|--------------------|--------------------------------------------------|
| Before four cycles | 5.98                                             |
| After four cycles  | 5.59                                             |

**The turnover frequency (TOF) values of the corresponding reactions were calculated according to following equation:<sup>29</sup>**

$$TOF = \frac{[MB] \times conversion}{[Pd] \times t} \quad \text{Eq.1}$$

Here the concentrations of methylene blue [MB] was fixed to be  $1.04 \times 10^{-5}$  M, and [Pd] was determined by ICP-AES. The conversion at time  $t$  can be obtained from Fig. 7c. We estimated the TOF values for all the runs with the conversion of MB at 30%. The TOF values of the catalytic reactions for 4-nitrophenol were calculated according to the equation similar to MB. The molar concentration [4-NP] of substrate was  $1 \times 10^{-5}$  M. The Pd molar concentration [Pd] of PdNPs@QPOSS@rGO in reaction systems was calculated by ICP-AES results. The conversion at reaction time  $t$  can be obtained from Fig. 8d. The calculation for TOF values of the catalytic reduction of nitrophenols with the conversion of NPs at 100%.

## References

1. G. Fu, L. Tao, M. Zhang, Y. Chen, Y. Tang, J. Lin and T. Lu, *Nanoscale*, 2013, **5**, 8007–8014.
2. M. Zhu, C. Wang, D. Meng and G. Diao, *J. Mater. Chem. A*, 2013, **1**, 2118–2125.
3. J. X. Ma, H. Yang, S. Li, R. Ren, J. Li, X. Zhang and J. Ma, *RSC Adv.*, 2015, **5**, 97520–97527.
4. V. Vilas, D. Philip and J. Mathew, *Mater. Chem. Phys.*, 2016, **170**, 1–11.
5. K. Y. Cho, Y. S. Yeom, H. Y. Seo, P. Kumar, A. S. Lee, K.Y. Baek and H. G. Yoon, *J. Mater. Chem. A*, 2015, **3**, 20471–20476.
6. F. Chen, A. S. Gong, M. Zhu, G. Chen, S. D. Lacey, F. Jiang, Y. Li, Y. Wang, J. Dai, Y. Yao, J. Song, B. Liu, K. Fu, S. Das and L. Hu, *ACS Nano*, 2017, **11**, 4275–4282.
7. T. Kim, X. Fu, D. Warther and M. J. Sailor, *ACS Nano*, 2017, **11**, 2773–2784.
8. S. Wang, J. Fu, K. Wang, M. Gao, X. Wang, Z. Wang, J. Chen and Q. Xu, *Appl. Surf. Sci.*, 2018, **459**, 208–216.
9. M. Vinothkannan, C. Karthikeyan, G. G. Kumar, A. R. Kim and D. J. Yoo, *Spectrochim. Acta, Part A*, 2015, **136**, 256–264.
10. R. Ma, P. Yang, Y. Ma and F. Bian, *ChemCatChem.*, 2018, **10**, 1446–1454.
11. J. Yang, M. Yuan, D. Xu, H. Zhao, Y. Zhu, M. Fan, F. Zhang and Z. Dong, *J. Mater. Chem. A*, 2018, **6**, 18242–18251.
12. K. Karami and N. S. Mousavi, *Dalton Trans.*, 2018, **47**, 4175–4182.
13. S. M. Sadeghzadeh, R. Zhianiab and S. Emrani, *New J. Chem.*, 2018, **42**, 988–994.
14. Wang, H. Duan, J. Lu and C. Lu, *J. Mater. Chem. A*, 2017, **5**, 5088–5097.
15. X. Ni, Z. Wu, X. Gu, D. Wang, C. Yang, P. Sun and Y. Li, *Langmuir*, 2017, **33**, 8157–8164.
16. X. Wu, C. Lu, W. Zhang, G. Yuan, R. Xiong and X. Zhang, *J. Mater. Chem. A*, 2013, **1**,

8645–8652.

17. H. Joshi, K. N. Sharma, A. K. Sharma and A. K. Singh, *Nanoscale*, 2014, **6**, 4588–4597.
18. X. Yang, Z. Fei, D. Zhao, W. H. Ang, Y. Li and P. J. Dyson, *Inorg. Chem.*, 2008, **47**, 3292–3297.
19. V. B. Saptal, M. V. Saptal, R. S. Mane, T. Sasaki and B. M. Bhanage, *ACS Omega*, 2019, **4**, 64–649.
20. Y. Li, Z. Zhang, J. Shen and M. Ye, *Dalton Trans.*, 2015, **44**, 16592–16601.
21. H. Veisi, S. Najafi, S. Hemmati, *Int. J. Biol. Macromol.*, 2018, **113**, 186–194.
22. L. Wu, B. Yuan, M. Liu, H. Huo, Y. Long, J. Ma and G. Lu, *RSC Adv.*, 2016, **6**, 56028–56034.
23. Y. Huang, Q. Wei, Y. Wang, L. Dai, *Carbon*, 2018, **136**, 150–159.
24. H. Song, Q. Zhu, X. Zhenga and X. Chen, *J. Mater. Chem. A*, 2015, **3**, 10368–10377.
25. T. P. N. Tran, A. Thakur, D. X. Trinh, A. T. N. Dao, T. Taniike, *Appl. Catal. A*, 2018, **549**, 60–67.
26. S. Shylesh, L. Wang, S. Demeshko and W. R. Thiel, *ChemCatChem*, 2010, **2**, 1543–1547.
27. B. Qi, X. Li, L. Sun, B. Chen, H. Chen, C. Wu, H. Zhang and X. Zhou, *Nanoscale*, 2018, **10**, 19846–19853.
28. R. F. Alamdari, M. G. Haqiqib and N. Zekria, *New J. Chem.*, 2016, **40**, 1287–1296.
29. X. Liu, F. Cheng, Y. Liu, H. Ji and Y. Chen, *J. Mater. Chem.*, 2010, **20**, 360–368.
